# Supplementary material for: COLEC10 is mutated in 3MC patients and regulates early craniofacial development
Source: PubMed Central journal article supplement (PMC5373641; doi:10.1371/journal.pgen.1006679), 2017-03-16
Supplement: pgen.1006679.s005.pdf [file pgen.1006679.s005.pdf]

|                                  | Mean CL-L1 concentration ± S.E.M. (ng/mL) |             |              |             |
|----------------------------------|-------------------------------------------|-------------|--------------|-------------|
|                                  | HeLa                                      |             | HEK293       |             |
|                                  | Cell extract                              | Supernatant | Cell extract | Supernatant |
| Untransfected                    | 22.9±0.4                                  | <1.0        | 23.4±0.3     | <1.0        |
| <i>COLEC10</i> (WT)              | 1823.5±7.4                                | 200.3±1.5   | 632.0±3.6    | 390.2±4.1   |
| <i>COLEC10</i> (p.Arg9Ter)       | 29.2±0.2                                  | <1.0        | 25.2±0.3     | <1.0        |
| <i>COLEC10</i> (p.Cys176Trp)     | 2518.4±21.2                               | 12.5±0.2    | 1302.7±3.5   | 5.7±0.1     |
| <i>COLEC10</i> (p.Gly77Glufs*66) | 13.8±0.1                                  | <1.0        | 31.7±0.4     | <1.0        |
