# Supplementary material for: COLEC10 is mutated in 3MC patients and regulates early craniofacial development
Source: PubMed Central journal article supplement (PMC5373641; doi:10.1371/journal.pgen.1006679), 2017-03-16
Supplement: pgen.1006679.s006.pdf [file pgen.1006679.s006.pdf]

| Target                   | Exon          | Gene    | Proband 19.1_average coverage | Proband 19.1_%_above_15x | Dad 19.3_average coverage | Dad 19.3_%_above_15x | Mum_19.4_average coverage | Mum 19.4_%_above_15x |
|--------------------------|---------------|---------|-------------------------------|--------------------------|---------------------------|----------------------|---------------------------|----------------------|
| 3:186964142-186965173    | MASP1_5'UTR   | MASP1   | 3.32                          | 6.6                      | 4.35                      | 16.6                 | 4.09                      | 13.9                 |
| 3:186968039-186968117    | MASP1_exon1   | MASP1   | 43.09                         | 100                      | 51.59                     | 100                  | 30.57                     | 100                  |
| 3:186969422-186969540    | MASP1_exon2   | MASP1   | 25.65                         | 100                      | 22.5                      | 98.3                 | 16.26                     | 59.7                 |
| 3:186970956-186971103    | MASP1_exon3   | MASP1   | 68.13                         | 100                      | 64.8                      | 100                  | 61.72                     | 100                  |
| 3:186974452-186974648    | MASP1_exon4   | MASP1   | 65.21                         | 100                      | 61.77                     | 100                  | 76.94                     | 100                  |
| 3:186978529-186978660    | MASP1_exon5   | MASP1   | 23.33                         | 90.2                     | 25.13                     | 100                  | 29.36                     | 97                   |
| 3:186980331-186980508    | MASP1_exon6   | MASP1   | 18.71                         | 93.3                     | 25.44                     | 92.7                 | 19.42                     | 85.4                 |
| 3:187003613-187003844    | MASP1_exon7   | MASP1   | 131.52                        | 100                      | 163.15                    | 100                  | 140.79                    | 100                  |
| 3:187009416-187009810    | MASP1_3'UTR   | MASP1   | 129.97                        | 86.3                     | 158.49                    | 87.3                 | 152.72                    | 90.9                 |
| 8:120079424-120079668    | COLEC10_5'UTR | COLEC10 | 75.29                         | 100                      | 84.46                     | 100                  | 80.26                     | 100                  |
| 8:120101919-120101990    | COLEC10_exon1 | COLEC10 | 25.31                         | 100                      | 46.72                     | 100                  | 51.24                     | 100                  |
| 8:120103388-120103459    | COLEC10_exon2 | COLEC10 | 85.56                         | 100                      | 116.54                    | 100                  | 112.86                    | 100                  |
| 8:120114587-120114640    | COLEC10_exon3 | COLEC10 | 60.83                         | 100                      | 67.26                     | 100                  | 51.22                     | 100                  |
| 8:120116039-120116134    | COLEC10_exon4 | COLEC10 | 202.04                        | 100                      | 197.86                    | 100                  | 204.89                    | 100                  |
| 8:120118039-120119202    | COLEC10_3'UTR | COLEC10 | 30.61                         | 45.4                     | 46.64                     | 49.3                 | 37.52                     | 45.9                 |
| 2:3642637-3642758        | COLEC11_5'UTR | COLEC11 | 0.27                          | 0                        | 0                         | 0                    | 0.66                      | 0                    |
| 2:3651905-3652060        | COLEC11_exon1 | COLEC11 | 115.54                        | 100                      | 141.91                    | 100                  | 112.01                    | 100                  |
| 2:3660901-3660972        | COLEC11_exon2 | COLEC11 | 23.58                         | 100                      | 36.13                     | 100                  | 24.17                     | 100                  |
| 2:3673604-3673682        | COLEC11_exon3 | COLEC11 | 78.59                         | 100                      | 84.94                     | 100                  | 60.65                     | 100                  |
| 2:3685123-3685194        | COLEC11_exon4 | COLEC11 | 77.4                          | 100                      | 78.56                     | 100                  | 87.43                     | 100                  |
| 2:3687868-3687921        | COLEC11_exon5 | COLEC11 | 23.85                         | 100                      | 30.44                     | 100                  | 13.39                     | 24.1                 |
| 2:3691034-3691129        | COLEC11_exon6 | COLEC11 | 49.58                         | 100                      | 65.68                     | 100                  | 46.58                     | 100                  |
| 2:3691317-3692047        | COLEC11_3'UTR | COLEC11 | 34.02                         | 70.7                     | 41.03                     | 70.9                 | 35.65                     | 73.2                 |
| Genome Build GRCh37/hg19 |               |         |                               |                          |                           |                      |                           |                      |

## S1 Methods Table
