# Supplementary material for: COLEC10 is mutated in 3MC patients and regulates early craniofacial development
Source: PubMed Central journal article supplement (PMC5373641; doi:10.1371/journal.pgen.1006679), 2017-03-16
Supplement: pgen.1006679.s008.pdf [file pgen.1006679.s008.pdf]

### S3 Methods Table. Ingenuity filter pipeline

| <u>Filter</u>                                                         | <u>Feature (For Recessive Analysis)</u>             | TH                                                               |
|-----------------------------------------------------------------------|-----------------------------------------------------|------------------------------------------------------------------|
| Confidence                                                            | Call quality (Phred Score – Base call accuracy>99%) | 20.00                                                            |
| Common Variants                                                       | 1000 Genomes Project                                | 0.01                                                             |
|                                                                       | Complete Genomics genomes                           | 0.50                                                             |
|                                                                       | NHLBI ESP exomes                                    | 0.01                                                             |
|                                                                       | EXAC                                                | 0.01                                                             |
| Predicted Deleterious                                                 | Experimentally pathogenic                           | ✓                                                                |
|                                                                       | Likely pathogenic                                   | ✓                                                                |
|                                                                       | Uncertain significance                              | ✓                                                                |
|                                                                       | <b><u>Associated with gain of function</u></b>      |                                                                  |
|                                                                       | Established in Literature                           |                                                                  |
|                                                                       | Gene fusion                                         |                                                                  |
|                                                                       | Inferred activating mutation (Ingenuity)            |                                                                  |
|                                                                       | Predicted gain of function by BSIFT                 |                                                                  |
|                                                                       | <b><u>Associated with loss of function</u></b>      |                                                                  |
|                                                                       | Frameshift, in-frame indel, stop codon change       | ✓                                                                |
|                                                                       | Missense                                            | ✓                                                                |
|                                                                       | Likely splice site loss up to 2 bases into intron   | ✓                                                                |
|                                                                       | Genetic Analysis                                    | <b><u>Keep variants only if in at least one case sample:</u></b> |
| Homozygous                                                            |                                                     | ✓                                                                |
| Compound Heterozygous                                                 |                                                     | ✓                                                                |
| Haploinsufficient                                                     |                                                     |                                                                  |
| Hemizygous                                                            |                                                     |                                                                  |
| <b><u>Exclude variants if in 2 or more of the control samples</u></b> |                                                     |                                                                  |
| Filter out haploinsufficient and hemizygous variant                   |                                                     | ✓                                                                |
| Filter out homozygous and compound heterozygous                       |                                                     | ✓                                                                |
| Exclude variants in MUC and HLA loci                                  |                                                     | ✓                                                                |
| Present in dbSNP database                                             |                                                     |                                                                  |
| Biological Context                                                    | 3MC syndrome type 1 ( <i>MASP1</i> )                | ✓                                                                |
|                                                                       | 3MC syndrome type 2 ( <i>COLEC11</i> )              | ✓                                                                |
