# Supplementary material for: COLEC10 is mutated in 3MC patients and regulates early craniofacial development
Source: PubMed Central journal article supplement (PMC5373641; doi:10.1371/journal.pgen.1006679), 2017-03-16
Supplement: pgen.1006679.s010.pdf [file pgen.1006679.s010.pdf]

**S5 Methods Table. Primer sequences**

| Primer name                   | Sequence (5'-3')                          |
|-------------------------------|-------------------------------------------|
| hCOLEC10Arg9Ter Forward       | GAGGATAAATTGGTTTCTTCAAAGCAAGGATGCAAAGCCAT |
| hCOLEC10Arg9Ter Reverse       | ATGGCTTTGCATCCTTGCTTTGAAGAAACCAATTTATCCTC |
| hCOLEC10Gly77Glufs*66 Forward | CATGGGGCCGAAAGGAATTAAGGAGAACTGGG          |
| hCOLEC10Gly77Glufs*66 Reverse | CCCAGTTCTCCTTAATTCCTTTGCGCCCATG           |
| hCOLEC10Cys176Trp Forward     | CACCCCGAATCCTCCAGTGGGTTAGGG               |
| hCOLEC10Cys176Trp Reverse     | CCCTAACCCACTGGAGGATTCGGGGTG               |
